# Supplementary material for: Hepatitis B Virus Reactivation in Cancer Patients Undergoing Immune Checkpoint Inhibitors Therapy: A Systematic Review
Source: PubMed Central journal article supplement (PMC9723987; doi:10.7150/jca.77247), 2022-10-31
Supplement: jcav13p3539s1.pdf [file jcav13p3539s1.pdf]

Table S1 Clinical Trials of Relatlimab (Anti LAG3)

| Rank | Clinical trial | Status                 | Study Results        | Conditions                   |
|------|----------------|------------------------|----------------------|------------------------------|
| 1    | NCT03470922    | Active,not recruiting  | Has Results          | Melanoma                     |
| 2    | NCT03662659    | Active,not recruiting  | Has Results          | Gastric Cancer               |
| 3    | NCT02488759    | Active,not recruiting  | Has Results          | Various Advanced Cancer      |
| 4    | NCT04112498    | Active,not recruiting  | No Results Available | Cancer                       |
| 5    | NCT03044613    | Active,not recruiting  | No Results Available | Gastric Cancer               |
| 6    | NCT03867799    | Active,not recruiting  | No Results Available | Metastatic Colorectal Cancer |
| 7    | NCT01968109    | Active,not recruiting  | No Results Available | Neoplasms by Site            |
| 8    | NCT02519322    | Active, not recruiting | No Results Available | Cutaneous Melanoma           |
| 9    | NCT02966548    | Active,not recruiting  | No Results Available | Cancer                       |
| 10   | NCT02996110    | Active,not recruiting  | No Results Available | Advanced Cancer              |
| 11   | NCT02935634    | Active,not recruiting  | No Results Available | Advanced Gastric Cancer      |
| 12   | NCT03335540    | Active,not recruiting  | No Results Available | Advanced Cancer              |
| 13   | NCT02061761    | Completed              | No Results Available | Hematologic Neoplasms        |
| 14   | NCT05170659    | No longer available    | No Results Available |                              |
| 15   | NCT05170685    | No longer available    | No Results Available |                              |
| 16   | NCT05498480    | Not yet recruiting     | No Results Available | Advanced Solid Tumors        |
| 17   | NCT05418972    | Not yet recruiting     | No Results Available | Stage II Melanoma            |
| 18   | NCT05255601    | Not yet recruiting     | No Results Available | Lymphoma                     |
| 19   | NCT05428007    | Not yet recruiting     | No Results Available | Melanoma                     |
| 20   | NCT05347212    | Not yet recruiting     | No Results Available | Renal Medullary Carcinoma    |
| 21   | NCT04552223    | Recruiting             | No Results Available | Melanoma                     |

|    |             |            |                      |                                                           |
|----|-------------|------------|----------------------|-----------------------------------------------------------|
| 22 | NCT04658147 | Recruiting | No Results Available | Hepatocellular Carcinoma                                  |
| 23 | NCT04095208 | Recruiting | No Results Available | Soft Tissue Sarcoma                                       |
| 24 | NCT03623854 | Recruiting | No Results Available | Chordoma                                                  |
| 25 | NCT03743766 | Recruiting | No Results Available | Melanoma                                                  |
| 26 | NCT04080804 | Recruiting | No Results Available | Head and Neck Squamous Cell Carcinoma (HNSCC)             |
| 27 | NCT04913922 | Recruiting | No Results Available | Acute Myeloid Leukemia                                    |
| 28 | NCT05002569 | Recruiting | No Results Available | Melanoma                                                  |
| 29 | NCT03642067 | Recruiting | No Results Available | Colorectal Adenocarcinomas                                |
| 30 | NCT04567615 | Recruiting | No Results Available | Hepatocellular Carcinoma                                  |
| 31 | NCT05328908 | Recruiting | No Results Available | Colorectal Neoplasms                                      |
| 32 | NCT05337137 | Recruiting | No Results Available | Carcinoma, Hepatocellular                                 |
| 33 | NCT03607890 | Recruiting | No Results Available | Refractory MSI - H Solid Tumors Prior of PD-(L) 1 Therapy |
| 34 | NCT03978611 | Recruiting | No Results Available | Melanoma                                                  |
| 35 | NCT03521830 | Recruiting | No Results Available | Basal Cell Carcinoma                                      |
| 36 | NCT04326257 | Recruiting | No Results Available | Squamous Cell Carcinoma of the Head and Neck              |
| 37 | NCT04623775 | Recruiting | No Results Available | Non-small Cell Lung Cancer                                |
| 38 | NCT04205552 | Recruiting | No Results Available | NSCLC Stage II NSCLC, Stage IIIA NSCLC, Stage I           |
| 39 | NCT04611126 | Recruiting | No Results Available | Metastatic Ovarian Cancer                                 |
| 40 | NCT05134948 | Recruiting | No Results Available | Advanced Solid Tumors                                     |
| 41 | NCT03459222 | Recruiting | No Results Available | Advanced Cancer                                           |
| 42 | NCT05148546 | Recruiting | No Results Available | Renal Cell Carcinoma                                      |

|    |             |            |                      |                                |
|----|-------------|------------|----------------------|--------------------------------|
| 43 | NCT03610711 | Recruiting | No Results Available | Gastroesophageal Cancer        |
| 44 | NCT04062656 | Recruiting | No Results Available | Gastric Cancer                 |
| 45 | NCT03310619 | Recruiting | No Results Available | Lymphoma,                      |
| 46 | NCT02465060 | Recruiting | No Results Available | Advanced Malignant Solid tumor |
| 47 | NCT04150965 | Recruiting | No Results Available | Multiple Myeloma               |
| 48 | NCT04866810 | Recruiting | No Results Available | Melanoma                       |
| 49 | NCT03724968 | Terminated | Has Results          | Metastatic Melanoma            |
| 50 | NCT02750514 | Terminated | Has Results          | Advanced Cancer                |
| 51 | NCT03704077 | Withdrawn  | No Results Available | Gastric Cancer                 |

Table S2 Ongoing Clinical Trials of Anti TIM-3 in Cancer patients

| Drugs               | Stage | Biologic Classification                      | HBV reactivation | Clinical Trial Status |
|---------------------|-------|----------------------------------------------|------------------|-----------------------|
| sabatolimab         | III   | anti-TIM3 monoclonal antibody                | 0                | recruiting            |
| MAS825              | II    | anti-TIM3 monoclonal antibody                | 0                | recruiting            |
| cobolimab (TSR-022) | I/II  | anti-PD-1 and Anti-TIM-3 Bispecific Antibody | 0                | recruiting            |

|            |      |                                               |   |                            |
|------------|------|-----------------------------------------------|---|----------------------------|
| BGB-A425   | I/II | anti-TIM3 monoclonal antibody                 | 0 | recruiting                 |
| BMS-986258 | I/II | anti-TIM3 monoclonal antibody                 | 0 | Active, not recruiting     |
| INCAGN2390 | I/II | anti-TIM3 monoclonal antibody                 | 0 | Completed                  |
| LBL003     | I    | anti-TIM3 monoclonal antibody                 | 0 | recruiting                 |
| LY3321367  | I    | anti-TIM3 monoclonal antibody                 | 0 | Active, not recruiting     |
| LY3415244  | I    | anti-PD-L1 and Anti-TIM-3 Bispecific Antibody | 0 | Terminated<br>Has Results  |
| SHR-1702   | I    | anti-TIM3 monoclonal antibody                 | 0 | Active, not recruiting     |
| Sym023     | I    | anti-TIM3 monoclonal antibody                 | 0 | Completed<br>Has Results   |
| TQB2618    | I    | anti-TIM3 monoclonal antibody                 | 0 | Recruiting                 |
| Sym023     | I    | anti-TIM3 monoclonal antibody                 | 0 | Completed<br>(Has Results) |
| AZD7789    | I/II | PD-1/TIM-3 bispecific monoclonal antibody     | 0 | Recruiting                 |
